# Supplementary material for: Single molecule microscopy reveals key physical features of repair foci in living cells
Source: eLife. 2021 Feb 5;10:e60577. doi: 10.7554/eLife.60577 (PMC7924958; doi:10.7554/eLife.60577)
Supplement: Supplementary file 3. [file elife-60577-supp3.xlsx]

## Sheet: yeast strains
	yAT	Mating Type	Genotype
	1003	a	ADE2 RAD5 his3::ura3-ISceI(loxP)
	2708	α	ADE2 RAD5
	2709	a	ADE2 TRP1 lys2∆ RAD5
	2781	α	ADE2 bar1::LEU2 LYS2 RAD5 rad52::RAD52-RFP
	3026	α	ADE2 RAD5 rad52::RAD52-mMaple
	3153	a	ADE2 TRP1 lys2∆ RAD5 rad52::RAD52-HaloTag pdr5∆::NAT
	3334	α	ADE2 RAD5 rad52::RAD52-mMaple trp1::Gal-ISCeI-TRP1 lys2::ura3-ISceI(loxP-KanMX-loxP)
	3341	a	cen6-∆ ChrVI TEL6R-7L-noTG rap1::GFP-RAP1(LEU2) sir3::pTEF-SIR3(KAN)
	3346	α	ADE2 RAD5 rad52::RAD52-mMaple trp1::Gal-ISCeI-TRP1 lys2::ura3-ISceI(loxP-KanMX-loxP) ura3∆::NatNT2
	3391	a	ADE2 TRP1 lys2∆ RAD5 rad52::RAD52-HaloTag pdr5∆::NAT rad51∆::KanMX
	3397	α	ADE2 RAD5 pdr5∆::NAT his3::NLS-HaloTag(LoxP-KanMX-LoxP)
	3449	a	ADE2 RAD5 lys2::ura3-ISceI(loxP) trp1::Gal-ISCeI-TRP1 ura3∆::KanMX htb2::HTB2-mMaple(HIS3_MX6) Pdr5∆::Nat RAD52-HaloTag
	3453	a	ADE2 RAD5 MRE11-LLAKKRKG_YFP Pdr5∆::Nat RAD52-HaloTag
	3566	α	ADE2 RAD5 rad52::RAD52-mMaple trp1::Gal-ISCeI-TRP1 lys2::ura3-ISceI(loxP-KanMX-loxP) ura3∆::NatNT2 his3::ura3-ISceI(loxP)
	3568	a	ADE2 RAD5 lys2::ura3-ISceI(loxP) trp1::Gal-ISCeI-TRP1 ura3∆::KanMX htb2::HTB2-mMaple(HIS3_MX6) Pdr5∆::Nat RAD52-HaloTag his3::ura3-ISceI(loxP)
	3594	α	ADE2 RAD5 RAD52-HaloTag pdr5∆::LEU2
	3740	a	ADE2 RAD5 lys2::ura3-ISceI(loxP) trp1::Gal-ISCeI-TRP1 ura3∆::KanMX htb2::HTB2-mMaple(HIS3_MX6) Pdr5∆::Nat rad52::(hphNT1)ADHp-RAD52-HaloTag
	3741	a	ADE2 RAD5 lys2::ura3-ISceI(loxP) trp1::Gal-ISCeI-TRP1 ura3∆::KanMX htb2::HTB2-mMaple(HIS3_MX6) Pdr5∆::Nat rad52::(hphNT1)GDPp-RAD52-HaloTag
	3742	a	ADE2 RAD5 lys2::ura3-ISceI(loxP) trp1::Gal-ISCeI-TRP1 ura3∆::KanMX htb2::HTB2-mMaple(HIS3_MX6) Pdr5∆::Nat rad52::(hphNT1)TEF1p-RAD52-HaloTag

## Sheet: primers
primers	sequence
116	-559 HIS3 F	GGAACTTGGATTTATGGCTC
117	+902 HIS3 R	GCCACCTATCACCACAACTAAC
384	+1359 F RAD52	CGAAGAGAAGTTGGAAGACC
431	+209 R nat	TCCGATTCGTCGTCCGATTC
595	+3060 LYS2 F	GGCAGGTATCACCTATGGTACTTGGAACGAAAAATTTGCCTCAAATATTcgtacgctgcaggtcgac
596	+3163 LYS2 R	CTTCTCATCTGAAAGACCAAATTGGCTTTTAGATAAATCGCCTAATACAACccgattcattaatgcagg
1939	F_gDNA for RAD52	ATCAGTAGGCTTGCGTGCATGCA
1940	R_gDNA for RAD52	AACTGCATGCACGCAAGCCTACT
1941	F_dDNA	ACAAAGATCGACACGAAGAGAAGTTGGAAGACCAAAGATCAATCCACTGCATGCACGCAAGCCTACTCGTACGCTGCAGGTCGAC
1942	R_dDNA	AATAAATAATGATGCAAATTTTTTATTTGTTTCGGCCAGGAAGCGTTTCACTTGTACAGCTCGTCCAT
1944	F1_Check_CRISPR	TAGCTAAGCAAAGCCCAACT
1947	R1_check_CRISPR	ATACGACACATGGAGGAAAGA
2165	F_S1-Pdr5	CCCTTTTAAGTTTTCGTATCCGCTCGTTCGAAAGACTTTAGACAAAAATGCGTACGCTGCAGGTCGAC
2166	R_S2-Pdr5	AAGTCCATCTTGGTAAGTTTCTTTTCTTAACCAAATTCAAAATTCTATTAATCGATGAATTCGAGCTCG
2167	F_-20_Pdr5	TCGAAAGACTTTAGACAAAA
2168	R_+581_Pdr5	TAGTACAGCCAGAGCCTGGT
2182	dDNA F linker Rad52-Halo	ACAAAGATCGACACGAAGAGAAGTTGGAAGACCAAAGATCAATCCACTGCATGCACGCAAGCCTACTagtggaggcggaggtatg
2212	amF_S1-Ura3	TAACCCAACTGCACAGAACAAAAACCTGCAGGAAACGAAGATAAATCATGCGTACGCTGCAGGTCGAC
2213	amR_S2-Ura3	CTAATTTGTGAGTTTAGTATACATGCATTTACTTATAATACAGTTTTTTAATCGATGAATTCGAGCTCG
2402	dDNA R linker Rad52-Halo	AATAAATAATGATGCAAATTTTTTATTTGTTTCGGCCAGGAAGCGTTTCAaccggaaatctctagcgtcg
2421	R_LEU2	GGCTTCCAGCGCCTCAT
2526	F_gRNA for His3-11,15	ATCATTGCGATCTCTTTAAAGGG
2527	R_gRNA for His3-11,15	AACCCCTTTAAAGAGATCGCAAT
2609	amF	CCCTTTTAAGTTTTCGTATCCGCTCGTTCGAAAGACTTTAGACAAAAatgtctgcccctatgtctgcc
2610	amR	AAGTCCATCTTGGTAAGTTTCTTTTCTTAACCAAATTCAAAATTCTAttaagcaaggattttcttaac
2651	F_RAD52-S1	GGTTGCCAAGAACTGCTGAAGGTTCTGGTGGCTTTGGTGTGTTGTTGATGCGTACGCTGCAGGTCGAC
2652	R_RAD52-S4	GAATGGTTACCGAAAACGGGCTTCTTCTCATCCATATCCATAATTTCATTCATCGATGAATTCTCTGTCG
